# Supplementary material for: RETRACTED: Title : Anticancer Potential of Eudrilus Eugeniae Coelomic Fluid Protein on SCC-9 Cells-In Vitro Gene Expression entwined with Cutting-Edge In-Silico Strategy
Source: Research Square preprint supplement (doi:10.21203/rs.3.rs-439242/v1), 2021-04-21
Supplement: Supplementary file 1 [file 7e1aec9fb5af99c00b482ff9.docx]

|  |  | [A0A0P4VL51_9ANNE](http://192.168.1.96/mascot/cgi/protein_view.pl?file=..%2Fdata%2F20180918%2FF001571.dat&hit=1&db_idx=1) | | | Mass: 18503 | | Score: 96 | | | |  | Expect: 1.1e-006 Matches: 16 | | | | | | |
| --- | --- | --- | --- | --- | --- | --- | --- | --- | --- | --- | --- | --- | --- | --- | --- | --- | --- | --- |
|  |  |  | |  | | | | | | | | | | | | | | |
|  |  | Extracellular globin OS=Glossoscolex paulistus OX=1046353 GN=HgBp PE=3 SV=1 | | | | | | | | | | | | | | | | |
|  |  | Observed | Mr(expt) | | Mr(calc) | | ppm | Start | | |  | End Miss | | | | Ions | | Peptide |
|  | 652.3164 | | 651.3092 | | 651.3089 | | 0.44 | 110 | | | - 114 | | | 0 | | --- | | K.QHDPR.N |
|  | 678.3932 | | 677.3859 | | 677.3860 | | -0.19 | 61 | | | - | 65 | | 1 | | --- | | R.DLFKR.V |
|  | 720.4039 | | 719.3967 | | 719.3966 | | 0.06 | 42 | | | - | 47 | | 0 | | --- | | R.VEFGLR.L |
|  | 780.4116 | | 779.4043 | | 779.4038 | | 0.64 | 109 | | | - 114 | | | 1 | | --- | | K.KQHDPR.N |
|  | 876.5057 | | 875.4985 | | 875.4977 | | 0.84 | 41 | | | - | 47 | | 1 | | --- | | R.RVEFGLR.L |
|  | 1007.5381 | | 1006.5308 | | 1006.5308 | | 0.04 | 110 | | | - 117 | | | 1 | | --- | | K.QHDPRNLK.K |
|  | 1036.5362 | | 1035.5289 | | 1035.4774 | | 49.7 | 29 | | | - | 37 | | 0 | | --- | | K.NQWADAFGK.G |
|  | 1127.5001 | | 1126.4928 | | 1126.4931 | | -0.24 | 68 | | | - | 77 | | 0 | | --- | | R.GDNAYSPEFK.A |
|  | 1263.6488 | | 1262.6415 | | 1262.6408 | | 0.57 | 27 | | | - | 37 | | 1 | | --- | | K.VKNQWADAFGK.G |
|  | 1382.6691 | | 1381.6618 | | 1381.6626 | | -0.59 | 66 | | | - | 77 | | 1 | | --- | | R.VRGDNAYSPEFK.A |
| 1639.9054 | | | | 1638.8981 | | | 1638.8981 | 0.04 | | 126 | - 139 | | | | 0 | --- | | R.NHLLEILPEYIGTK.L | | |
| 2180.0556 | | | | 2179.0483 | | | 2179.0487 | -0.19 | | 48 | - | | | 64 | 1 | --- | | R.LWNSFFQDHPETRDLFK.R | | |
| 2218.0028 | | | | 2216.9955 | | | 2216.9949 | 0.26 | | 140 | - 158 | | | | 0 | --- | | K.LDFEAWTHCFNHISSGISP.- | | |
| 2378.2824 | | | | 2377.2751 | | | 2377.1604 | 48.3 | | 42 | - | | | 60 | 1 | --- | | R.VEFGLRLWNSFFQDHPETR.D | | |
| 2932.6197 | | | | 2931.6125 | | | 2931.5052 | 36.6 | | 83 | - 109 | | | | 1 | --- | | R.VLSGFDMTVSLLDDPDTFAAQIAHLKK.Q | | |
| 3838.8896 | | | | 3837.8824 | | | 3837.8825 | -0.02 | | 126 | - 158 | | | | 1 | --- | | R.NHLLEILPEYIGTKLDFEAWTHCFNHISSGISP | | |

**Appendix-1: Mascot Search Results with Details**
